# Supplementary material for: The Loss-Function of the Male Sterile Gene ZmMs33/ZmGPAT6 Results in Severely Oxidative Stress and Metabolic Disorder in Maize Anthers
Source: MDPI journal article supplement (doi:10.3390/cells11152318), 2022-07-27
Supplement: s1 [file s1]

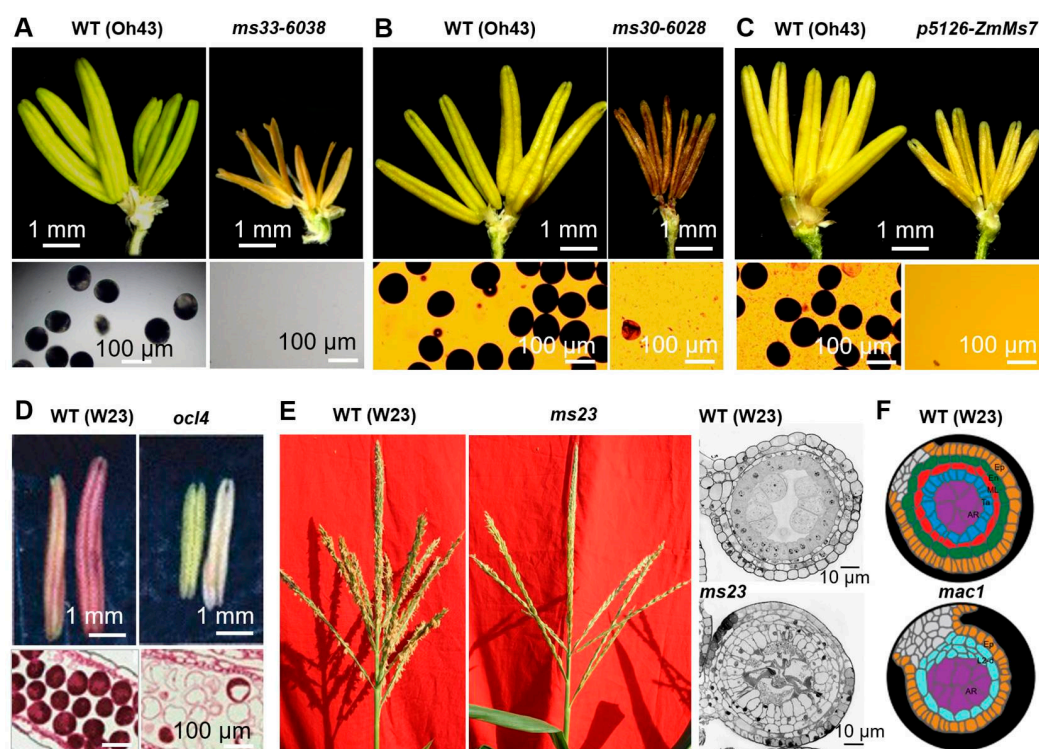

**Figure S2.** Phenotypes of anthers and pollen grains of *ms33-6038* and the other five maize GMS lines (*ms30-6028*, *p5126-ZmMs7*, *ocl4*, *ms23*, and *mac1*).

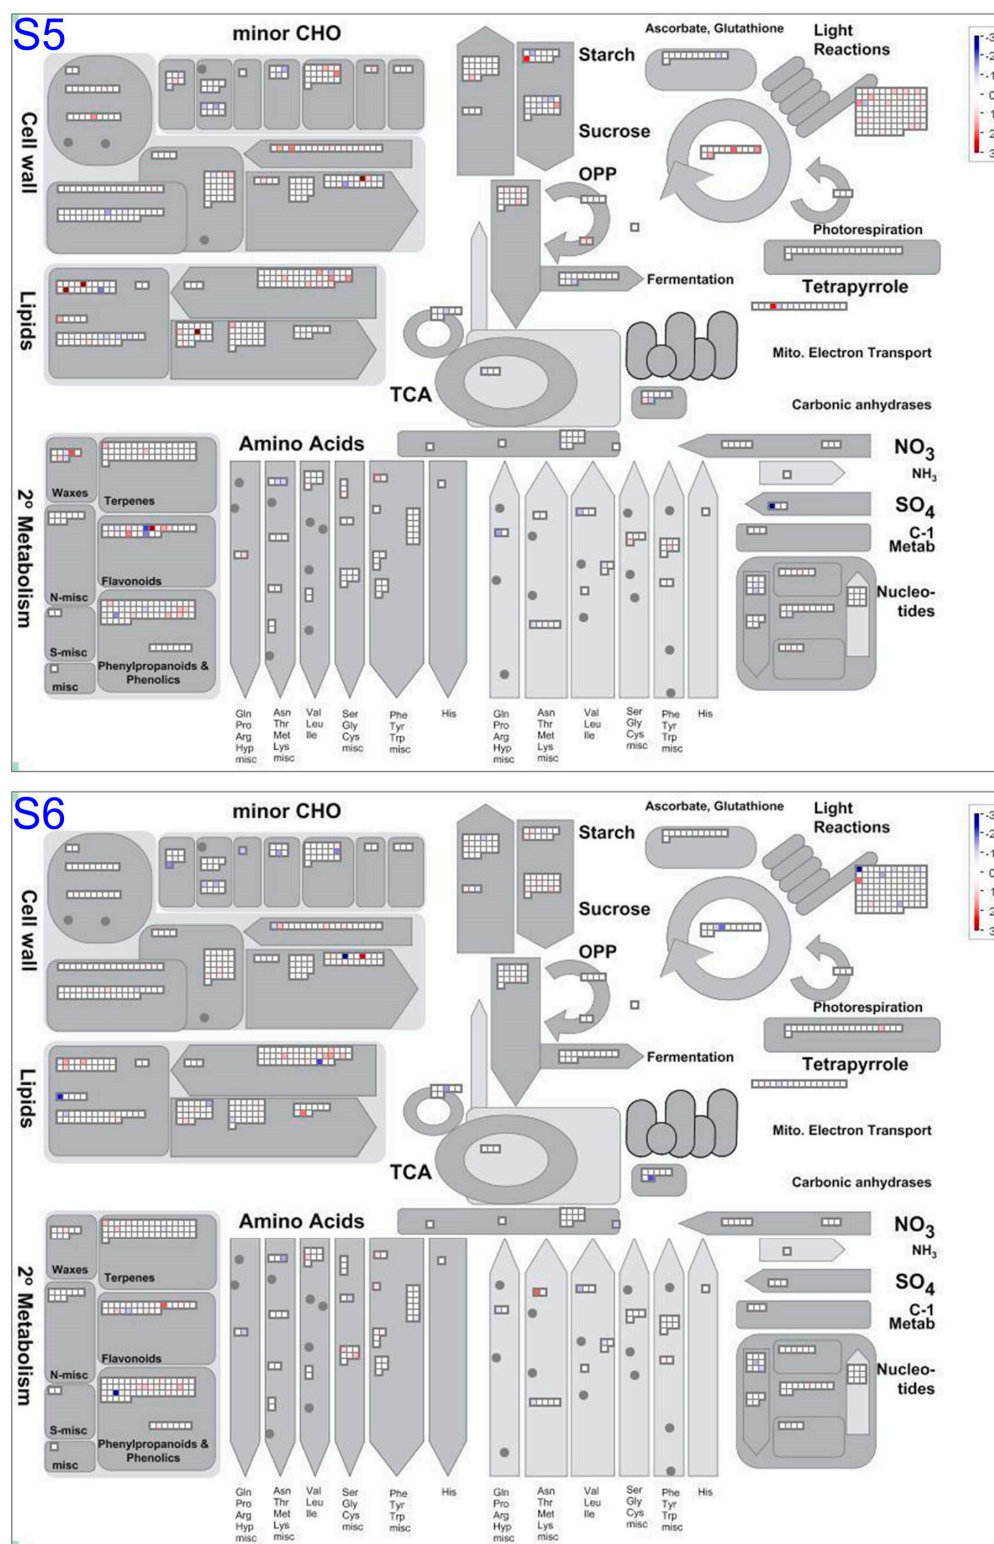

**Figure S3.** Expression changes of genes involved in primary metabolism pathways in the *ms33-6038* anther transcriptomes at stages S5 and S6.

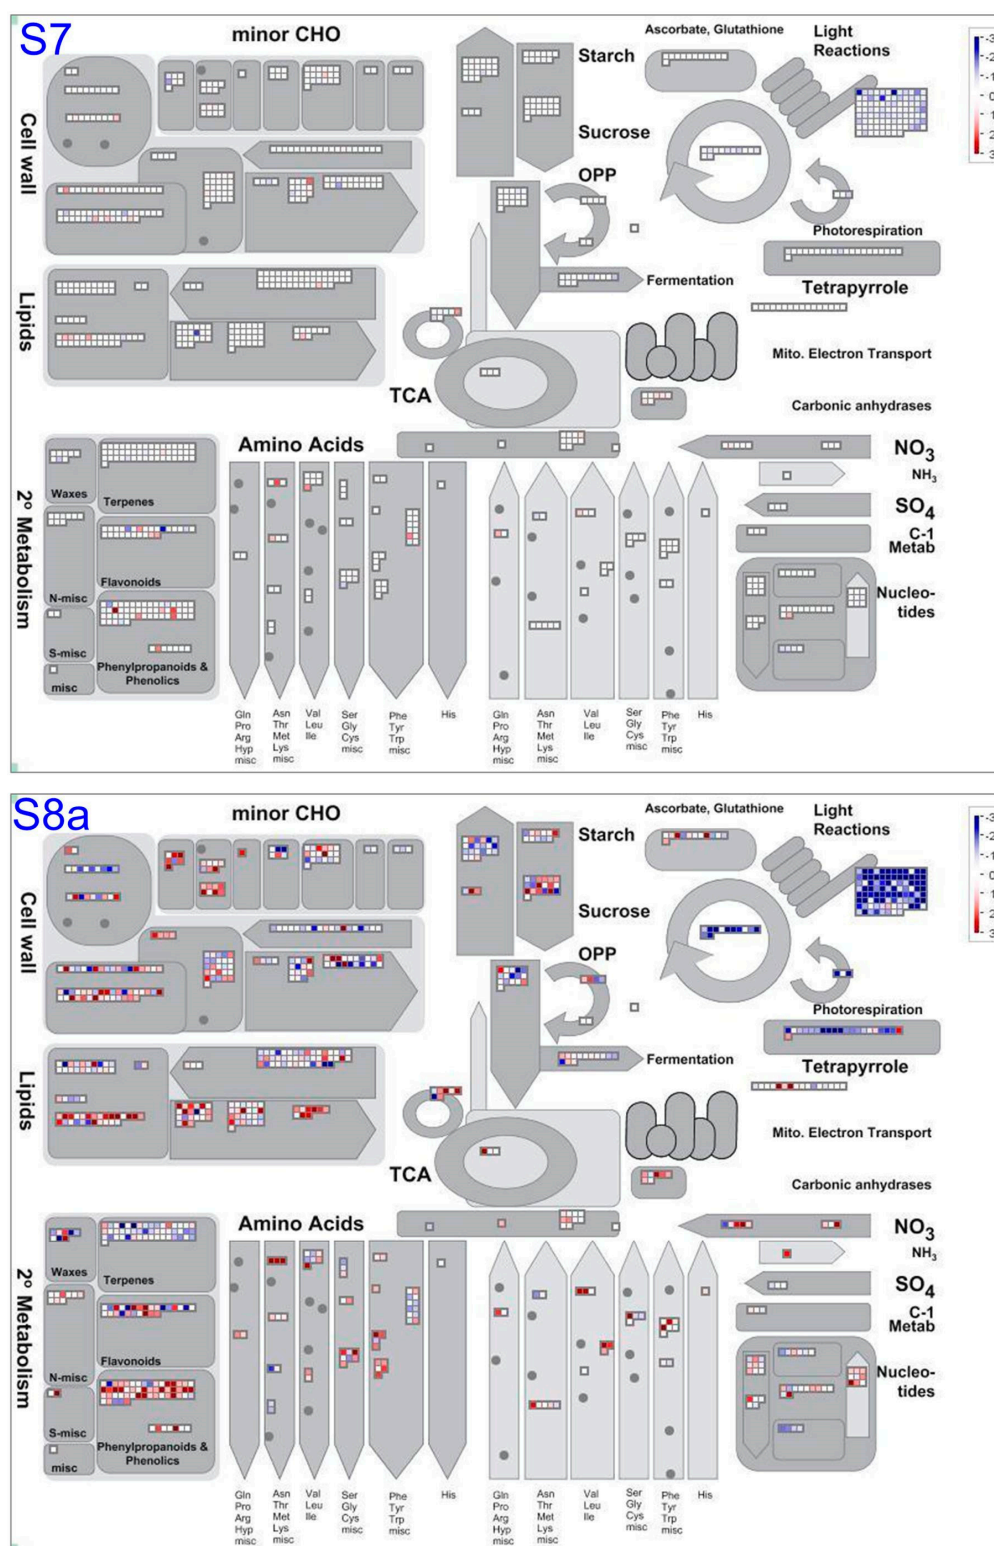

**Figure S4.** Expression changes of genes involved in primary metabolism pathways in the *ms33-6038* anther transcriptomes at stages S7 and S8a.



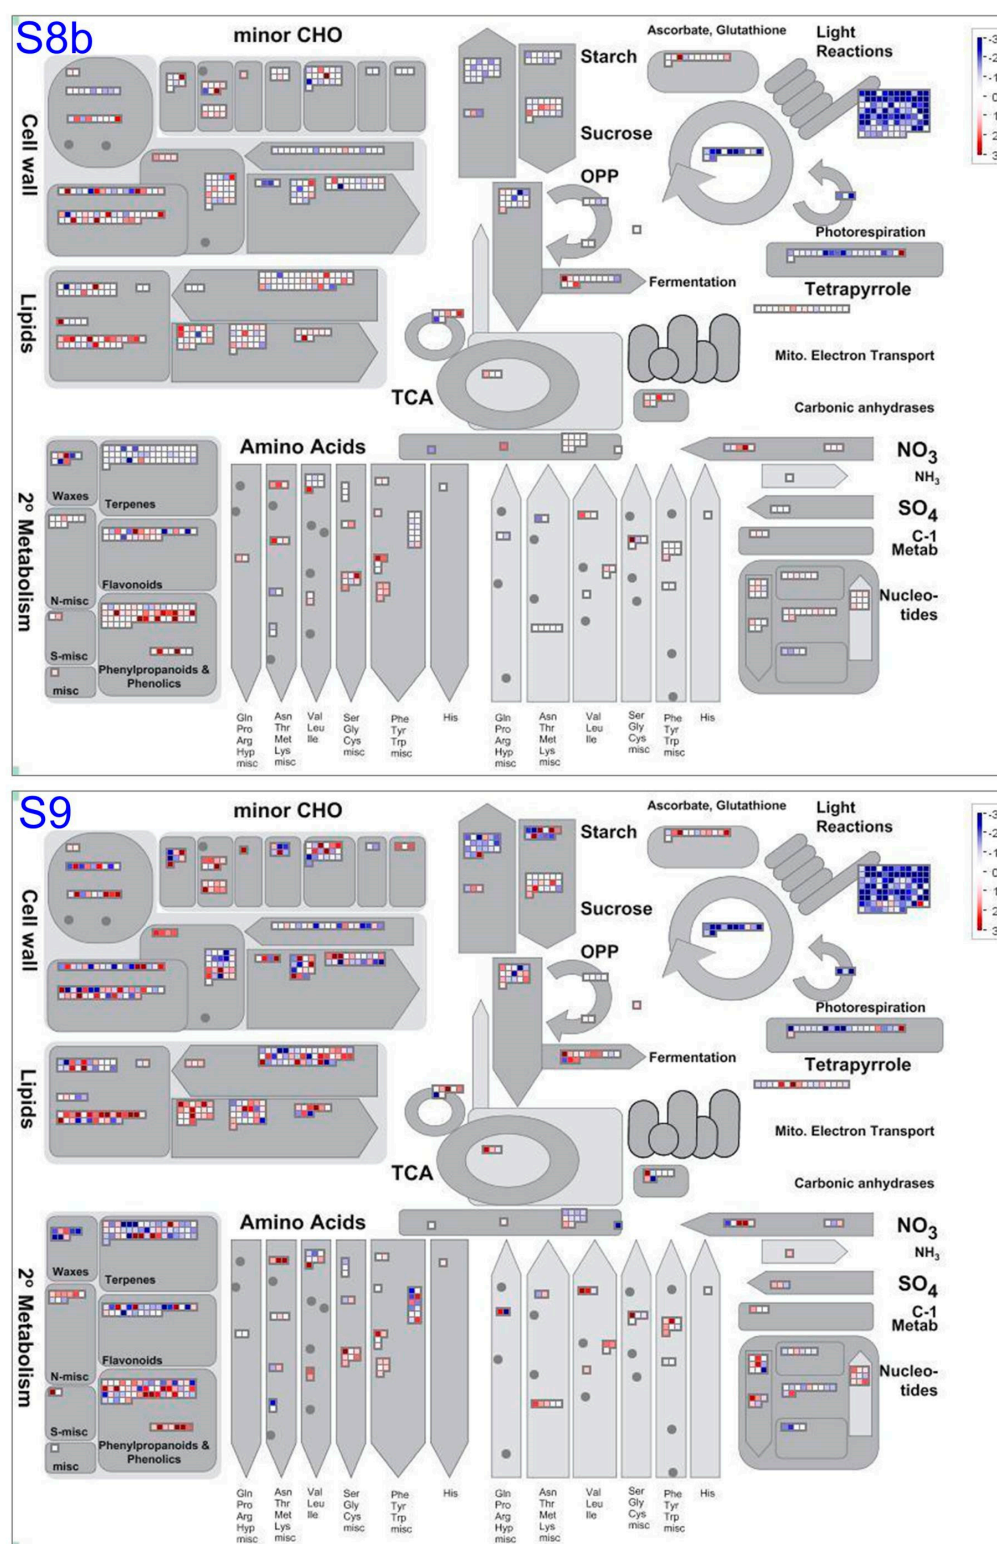

**Figure S5.** Expression changes of genes involved in primary metabolism pathways in the *ms33-6038* anther transcriptomes at stages S8b and S9.
