# Supplementary material for: The Loss-Function of the Male Sterile Gene ZmMs33/ZmGPAT6 Results in Severely Oxidative Stress and Metabolic Disorder in Maize Anthers
Source: Cells. 2022 Jul 27;11(15):2318. doi: 10.3390/cells11152318 (PMC9367433; doi:10.3390/cells11152318)
Supplement: Supplementary file 1 [file cells-11-02318-s001.zip]

Archive with 7 entries (7 files):
- Supplemental Figures.pdf
- Table S1.xlsx
- Table S2.xlsx
- Table S3.xlsx
- Table S4.xlsx
- Table S5.xlsx
- Table S6.xlsx
