# Supplementary material for: The Loss-Function of the Male Sterile Gene ZmMs33/ZmGPAT6 Results in Severely Oxidative Stress and Metabolic Disorder in Maize Anthers
Source: Cells. 2022 Jul 27;11(15):2318. doi: 10.3390/cells11152318 (PMC9367433; doi:10.3390/cells11152318)
Supplement: Supplementary file 1 [file cells-11-02318-s001.zip › Table S1.xlsx]

## Sheet: Table S1
Table S1: A summary of the transcriptomic data used in this study.
Transcriptomes	References
ms30-6028 and WT anthers	[1]
p5126-ZmMs7 and WT anthers	[2]
ocl4, mac1, ms23 and WT anthers	[3]
ms33-6038 and WT anthers	Available from the authors
References
1. An, X.; Dong, Z.; Tian, Y.; Xie, K.; Wu, S.; Zhu, T.; Zhang, D.; Zhou, Y.; Niu, C.; Ma, B., et al. ZmMs30 encoding a novel GDSL lipase is essential for male fertility and valuable for hybrid breeding in maize. Mol. Plant 2019, 12, 343-359.
2. An, X.; Ma, B.; Duan, M.; Dong, Z.; Liu, R.; Yuan, D.; Hou, Q.; Wu, S.; Zhang, D.; Liu, D., et al. Molecular regulation of ZmMs7 required for maize male fertility and development of a dominant male-sterility system in multiple species. Proc. Natl. Acad. Sci. USA 2020, 117, 23499-23509.
3. Zhai, J.; Zhang, H.; Arikit, S.; Huang, K.; Nan, G.L.; Walbot, V.; Meyers, B.C. Spatiotemporally dynamic, cell-type-dependent premeiotic and meiotic phasiRNAs in maize anthers. Proc. Natl. Acad. Sci. USA 2015, 112, 3146-3151.
