# Supplementary material for: The Loss-Function of the Male Sterile Gene ZmMs33/ZmGPAT6 Results in Severely Oxidative Stress and Metabolic Disorder in Maize Anthers
Source: Cells. 2022 Jul 27;11(15):2318. doi: 10.3390/cells11152318 (PMC9367433; doi:10.3390/cells11152318)
Supplement: Supplementary file 1 [file cells-11-02318-s001.zip › Table S2.xlsx]

## Sheet: Table S2
Table S2: Primers used in this study.
Primer name	Sequence (5’ to 3’)	Purpose
ZmActin1-F	AAATGACGCAGATTATGTTTGA	qRT-PCR
ZmActin1-R	GCTCGTAGTGAGGGAGTACC
Zm00001d054044-F	ACTTCCTGTCGCACCTCCC
Zm00001d054044-R	GTGTTCACGCCGAACCCT
Zm00001d037194-F	GGGCATTGGCTTGGGATC
Zm00001d037194-R	TTAAGAGCGACGAACAGGAGAA
Zm00001d052191-F	GGAAACGCTTGATCGCAACA
Zm00001d052191-R	GCCACGAGCAGCAGCACTA
Zm00001d048611-F	GGTGGTTGAACAATAATAAGC
Zm00001d048611-R	ACAAAGACTGACGCCAAA
Zm00001d014341-F	ATCAGGGCCTCGTCGTTT
Zm00001d014341-R	TTGGGTTCCTCTTTATTGCA
Zm00001d028348-F	GGAGCTTCGCCAGGTCCAT
Zm00001d028348-R	GCGCACCATTATCCCATCAA
Zm00001d029604-F	TGCTGGTCTTGGCCCTTGC
Zm00001d029604-R	ACGGCGGTCCTGATGGTGAG
Zm00001d036835-F	CGGATTCTACTCGCACTCG
Zm00001d036835-R	AAGAGGCGGAGGATGGAG
Zm00001d037359-F	TTCAAGCAGTTCTCCGACTC
Zm00001d037359-R	CCACCCTAAACAAGCCATC
Zm00001d040705-F	CCTCTTCTTCTCCGACAACCA
Zm00001d040705-R	GGCGACGAACTTCTCCTTCC
Zm00001d042022-F	CAAGGCGGAGTCCATCGTG
Zm00001d042022-R	CGAAGCAGTCGTGGAAGTGG
Zm00001d052335-F	CACGCTGCACCAACTTCA
Zm00001d052335-R	CAGCCTGACTGCCTCGTT
Zm00001d002426-F	AAGATAAACTACGAAGCCTACA
Zm00001d002426-R	GCAGACAGAGCCTACCATAC
Zm00001d031494-F	CCATGATGCAGGGACTTT
Zm00001d031494-R	CCGCCCACGACACTTTCT
Zm00001d037103-F	AACCTCCTCACTGTTCTGGG
Zm00001d037103-R	GATGCTGGTCGATCAAACG
Zm00001d016783-F	ACTCCGGTGGCTGGTTTTGG
Zm00001d016783-R	CTACAAGTACGCGCCGAGGG
Zm00001d006017-F	CCTCAGACCCAGACGACCCA
Zm00001d006017-R	TGCCCACGAACGAGAACGAC
Zm00001d028793-F	CTCTCGGTCACCACCGTCCA
Zm00001d028793-R	CAGCGACTGGAGGTTGCACTT
Zm00001d037165-F	GCCTTCTTCCAGTCGCCCAA
Zm00001d037165-R	AGCAGTCCAGTGTAGCGGAGA
Zm00001d006564-F	GTCCCAAGCAACTGACGAGA
Zm00001d006564-R	CACTGCCTGCACAAACACTC
Zm00001d043131-F	GAACCACCTCAGGCCCAAC
Zm00001d043131-R	GCCCACTTGTTCCCCATCTT
Zm00001d025664-F	CGGAGAAAGGCAACGACAGC
Zm00001d025664-R	CGACTTCGCACGAACGGTATT
Zm00001d042560-F	AACGTGACCAAGCTGCTGAA
Zm00001d042560-R	CTGGAGGATGGAGATGACGC
Zm00001d017724-F	CAATCCAGCCAACCTTACC
Zm00001d017724-R	CCATAGACAGCAGGAACCAA
Zm00001d053895-F	ACATGAAGCTCGATGGCATCAT
Zm00001d053895-R	CTTTCAACATGAACGAACGCA
Zm00001d046537-F	GCGGAGGACGATCATCACG
Zm00001d046537-R	CCCAGCGAGGAGAAGTGGT
Zm00001d027837-F	GGAACTACCACCGGATGCACG
Zm00001d027837-R	GAGGACATGCTCGACATTCACC
Zm00001d042618-F	GCTGAGCGGCAGCATGAGAG
Zm00001d042618-R	TGCACGCGGAAGGTGATTGG
Zm00001d012234-F	TGCGAGTGGAAGAAGCGAGC
Zm00001d012234-R	CCACCGACTTACAGACGCCG
