# Supplementary material for: The Loss-Function of the Male Sterile Gene ZmMs33/ZmGPAT6 Results in Severely Oxidative Stress and Metabolic Disorder in Maize Anthers
Source: Cells. 2022 Jul 27;11(15):2318. doi: 10.3390/cells11152318 (PMC9367433; doi:10.3390/cells11152318)
Supplement: Supplementary file 1 [file cells-11-02318-s001.zip › Table S3.xlsx]

## Sheet: Table S3
Table S3: A list of 194 genes related to the response to oxygen-containing components.
Class	Gene ID	response to salicylic acid	response to alcohol	response to carbohydrate	response to water	response to jasmonic acid	response to reactive oxygen species	response to brassinosteroid	Annotation
I. response to salicylic acid	Zm00001d002446	1	0	0	0	0	0	0	WAK53a-OsWAK receptor-like protein kinase
	Zm00001d003064	1	1	1	1	1	0	0	R2R3MYB-domain protein
	Zm00001d003209	1	1	0	1	0	0	0	AAA-ATPase ASD mitochondrial
	Zm00001d004706	1	1	1	0	1	1	0	Lipase-like PAD4
	Zm00001d005193	1	0	1	0	1	0	0	Protein LURP1
	Zm00001d005784	1	0	0	0	0	0	0	Transcription factor MYB36
	Zm00001d010115	1	0	1	1	1	0	0	Probable anion transporter 3 chloroplastic
	Zm00001d011645	1	1	0	0	1	0	0	Putative MYB DNA-binding domain superfamily protein
	Zm00001d012255	1	1	0	0	1	0	0	Putative MYB DNA-binding domain superfamily protein
	Zm00001d017383	1	0	0	0	0	0	0	myb domain protein 19
	Zm00001d019411	1	0	0	0	0	0	0	L-type lectin-domain containing receptor kinase V.9
	Zm00001d019758	1	0	0	0	1	0	0	chlorophyllase1
	Zm00001d020569	1	0	0	0	0	0	0	Transcription factor MYB36
	Zm00001d020780	1	0	0	0	0	0	0	glutathione transferase23
	Zm00001d021089	1	1	0	1	1	0	0	Ethylene-responsive transcription factor ERF112
	Zm00001d022139	1	1	1	1	1	0	0	Protein TIFY 10B
	Zm00001d022530	1	1	1	0	0	1	0	ETHYLENE INSENSITIVE 3-like 2 protein
	Zm00001d024160	1	0	1	0	1	0	0	Transcription factor TGA4
	Zm00001d025864	1	1	1	1	1	0	0	myb domain protein 15
	Zm00001d025920	1	0	0	0	0	0	0	Putative lectin-like receptor protein kinase family protein
	Zm00001d026197	1	1	0	0	0	0	0	MYB transcription factor9
	Zm00001d026398	1	0	0	0	0	0	0	Transcription factor TGA4
	Zm00001d027593	1	1	0	0	1	0	0	proteasome component3
	Zm00001d028167	1	0	0	0	0	0	0	Cytochrome b561 and DOMON domain-containing protein
	Zm00001d029583	1	1	0	0	1	0	0	Polygalacturonase inhibitor 1
	Zm00001d032620	1	1	0	0	0	0	0	NDR1/HIN1-like 25
	Zm00001d032868	1	0	0	0	0	0	0	L-type lectin-domain containing receptor kinase V.9
	Zm00001d032869	1	0	0	0	0	0	0	L-type lectin-domain containing receptor kinase V.9
	Zm00001d034217	1	0	0	0	0	0	0	Lectin-like receptor kinase 7
	Zm00001d034671	1	0	0	0	1	0	0	Lectin-like receptor kinase 7
	Zm00001d037035	1	0	1	0	0	0	0	Cyclic nucleotide-gated ion channel 1
	Zm00001d037095	1	0	1	0	1	0	0	Putative RING zinc finger domain superfamily protein
	Zm00001d038004	1	0	0	0	0	0	0	CASP-like protein 4B1
	Zm00001d038020	1	0	0	0	0	0	0	Putative leucine-rich repeat transmembrane protein kinase
	Zm00001d038165	1	1	0	0	1	0	0	Putative GID1-like gibberellin receptor
	Zm00001d038412	1	1	1	0	1	0	0	Ammonium transporter 2
	Zm00001d038991	1	0	0	0	0	0	0	Protein MALE DISCOVERER 2
	Zm00001d039963	1	0	1	0	1	0	0	Protein SAR DEFICIENT 1
	Zm00001d041327	1	0	1	0	1	0	0	Probable LRR receptor-like serine/threonine-protein kinase
	Zm00001d042665	1	1	0	0	1	0	0	Transcription repressor MYB6
	Zm00001d043491	1	1	1	1	1	0	0	Ethylene-responsive transcription factor 2
	Zm00001d047351	1	0	0	0	0	0	0	PLAC8 family protein
	Zm00001d050185	1	0	0	0	0	0	0	Putative MYB DNA-binding domain superfamily protein
	Zm00001d050521	1	0	0	0	0	1	0	Eukaryotic aspartyl protease family protein
	Zm00001d052136	1	0	0	0	1	0	0	1-aminocyclopropane-1-carboxylate oxidase20
II. response to alcohol	Zm00001d002006	0	1	0	1	0	0	0	H(+)-ATPase 5
	Zm00001d004366	0	1	0	1	0	1	0	UDP-glycosyltransferase 74B1
	Zm00001d005888	0	1	0	1	0	0	0	Heat stress transcription factor B-3
	Zm00001d008200	0	1	0	0	0	0	0	Hydrophobic protein LTI6B
	Zm00001d008255	0	1	0	0	0	1	1	Yucca6
	Zm00001d008795	0	1	0	1	0	1	0	UDP-glycosyltransferase 74B1
	Zm00001d010210	0	1	0	1	0	0	0	Potassium channel2
	Zm00001d011413	0	1	0	0	0	1	0	Putative WRKY DNA-binding domain superfamily protein
	Zm00001d011638	0	1	0	0	0	0	0	Lipid phosphate phosphatase 2
	Zm00001d011639	0	1	1	0	0	0	1	AP2/ERF and B3 domain-containing transcription repressor TEM1
	Zm00001d012819	0	1	0	0	0	0	0	Protein SRG1
	Zm00001d014945	0	1	1	0	0	1	0	Lactate/malate dehydrogenase family protein
	Zm00001d016285	0	1	1	0	0	0	0	Protein kinase family protein with leucine-rich repeat domain
	Zm00001d016950	0	1	1	1	1	1	0	NAC30 NAC type transcription factor
	Zm00001d017288	0	1	0	1	0	0	0	Aquaporin PIP2-4
	Zm00001d017825	0	1	1	0	0	0	1	AT-hook motif nuclear-localized protein 29
	Zm00001d020714	0	1	0	1	0	0	0	Heat shock factor protein 4
	Zm00001d020915	0	1	0	0	0	0	0	Pirin-like protein 2
	Zm00001d023365	0	1	0	0	0	0	0	Putative CBL-interacting protein kinase family protein
	Zm00001d023376	0	1	0	0	0	0	0	aluminum-induced protein homolog1
	Zm00001d025831	0	1	0	0	0	0	0	ammonium transporter1
	Zm00001d026490	0	1	0	1	0	0	0	proton-exporting ATPase4
	Zm00001d027676	0	1	0	0	0	1	0	Calmodulin-binding receptor-like cytoplasmic kinase 1
	Zm00001d028325	0	1	0	0	1	0	1	brassinosteroid synthesis1
	Zm00001d028814	0	1	0	0	0	0	0	Pathogenesis-related protein 10
	Zm00001d028815	0	1	0	0	0	0	0	Pathogenesis-related protein 10
	Zm00001d029288	0	1	0	0	0	0	1	Cytochrome P450 709B2
	Zm00001d029289	0	1	0	0	0	0	1	Cytochrome P450 709B2
	Zm00001d029397	0	1	0	1	0	0	0	phospholipase D7
	Zm00001d031221	0	1	0	0	0	0	0	AAA-ATPase ASD mitochondrial
	Zm00001d031677	0	1	0	0	0	0	0	MtN19-like protein
	Zm00001d032850	0	1	0	0	0	0	0	phosphate transporter protein2
	Zm00001d033623	0	1	0	0	1	0	0	Lipoxygenase
	Zm00001d034501	0	1	0	0	0	0	0	AAA-ATPase ASD mitochondrial
	Zm00001d034829	0	1	0	0	0	0	0	Pirin-like protein 2
	Zm00001d038326	0	1	0	0	0	0	0	Serine/threonine-protein kinase SRK2A
	Zm00001d040326	0	1	0	0	0	0	0	NAD(P)-binding Rossmann-fold superfamily protein
	Zm00001d040649	0	1	0	0	0	0	1	Probable pectinesterase/pectinesterase inhibitor 7
	Zm00001d042056	0	1	1	0	1	1	0	Calcium-binding protein CML38
	Zm00001d043480	0	1	0	0	0	0	0	Proline-rich receptor-like protein kinase PERK15
	Zm00001d043512	0	1	1	0	0	0	0	Protein kinase family protein with leucine-rich repeat domain
	Zm00001d044662	0	1	0	0	0	0	1	ZHD9 ZF-HD type transcription factor
	Zm00001d044864	0	1	0	0	0	0	1	Protein EXORDIUM
	Zm00001d046236	0	1	1	0	0	0	0	Putative leucine-rich repeat receptor-like protein kinase family protein
	Zm00001d047418	0	1	0	0	0	0	1	Cytochrome P450 709B2
	Zm00001d047436	0	1	0	0	0	0	0	AAA-ATPase ASD mitochondrial
	Zm00001d047573	0	1	0	0	0	0	1	F-box protein
	Zm00001d048230	0	1	1	1	1	0	0	E3 ubiquitin-protein ligase ATL6
	Zm00001d048647	0	1	0	0	1	0	0	Putative MYB DNA-binding domain superfamily protein
	Zm00001d050132	0	1	0	0	0	0	1	bri1-like receptor kinase3
	Zm00001d051156	0	1	0	0	0	0	0	Putative phosphoenolpyruvate carboxylase kinase family protein
III. response to carbohydrate	Zm00001d007973	0	0	1	0	0	0	0	Galactoside 2-alpha-L-fucosyltransferase
	Zm00001d009755	0	0	1	0	0	0	0	Putative calmodulin-binding family protein
	Zm00001d011438	0	0	1	0	0	0	0	Dihydroflavonol-4-reductase
	Zm00001d012229	0	0	1	0	0	0	0	Amino acid permease 6
	Zm00001d014530	0	0	1	0	0	0	0	Phenolic glucoside malonyltransferase 1
	Zm00001d015884	0	0	1	0	0	0	0	Protein kinase
	Zm00001d016457	0	0	1	0	0	0	0	Probable WRKY transcription factor 11
	Zm00001d017958	0	0	1	0	0	0	0	Glutamine synthetase root isozyme 3
	Zm00001d017992	0	0	1	0	0	0	0	Metalloendoproteinase 1
	Zm00001d022597	0	0	1	0	0	0	0	NEP1-interacting protein-like 1
	Zm00001d023258	0	0	1	0	0	0	0	Calcium-transporting ATPase 4 plasma membrane-type
	Zm00001d025524	0	0	1	0	1	0	0	lipoxygenase7
	Zm00001d027530	0	0	1	0	0	0	0	NAC-transcription factor 53
	Zm00001d028303	0	0	1	0	0	0	0	Branched-chain-amino-acid aminotransferase
	Zm00001d029383	0	0	1	0	0	0	0	WAT1-related protein
	Zm00001d029892	0	0	1	0	0	0	0	Metalloendoproteinase 1-MMP
	Zm00001d032008	0	0	1	0	0	0	0	NEP1-interacting protein-like 1
	Zm00001d032103	0	0	1	0	0	0	0	4-coumarate--CoA ligase 1
	Zm00001d032422	0	0	1	0	0	0	0	Dormancy-associated protein 1
	Zm00001d035457	0	0	1	0	0	0	0	Trihelix transcription factor GT-3b
	Zm00001d035999	0	0	1	0	0	0	0	BAG family molecular chaperone regulator 1
	Zm00001d036364	0	0	1	0	0	0	0	NAC domain containing protein 36
	Zm00001d038280	0	0	1	0	0	0	0	U-box domain-containing protein 29
	Zm00001d038576	0	0	1	0	0	0	0	Calcium-transporting ATPase 4 plasma membrane-type
	Zm00001d039053	0	0	1	0	0	0	0	3-ketoacyl-CoA synthase
	Zm00001d040670	0	0	1	0	0	0	0	Lipoamide acyltransferase component
	Zm00001d042758	0	0	1	0	0	0	0	NAC domain-containing protein 90
	Zm00001d043680	0	0	1	0	0	0	0	Phospholipase A1-IIdelta
	Zm00001d044608	0	0	1	0	0	0	0	asparagine synthetase2
	Zm00001d046945	0	0	1	0	0	0	0	Vacuolar sorting receptor 7
	Zm00001d050224	0	0	1	0	0	0	0	4-coumarate--CoA ligase 1
	Zm00001d052170	0	0	1	0	0	0	0	Galactoside 2-alpha-L-fucosyltransferase
	Zm00001d052268	0	0	1	0	0	0	0	NEP1-interacting protein-like 2
	Zm00001d052733	0	0	1	0	0	0	0	BAG family molecular chaperone regulator 1
IV. response to water	Zm00001d003015	0	0	0	1	0	0	0	phenylalanine ammonia lyase6
	Zm00001d007097	0	0	0	1	0	1	0	Protein EARLY RESPONSIVE TO DEHYDRATION 15
	Zm00001d007718	0	0	0	1	1	0	0	benzoxazinone synthesis13
	Zm00001d012561	0	0	0	1	0	0	0	Cystatin2%3B Cysteine proteinase inhibitor%3B Putative cystatin
	Zm00001d013830	0	0	0	1	0	0	0	cytochrome P450 family 76 subfamily C polypeptide 7
	Zm00001d017274	0	0	0	1	0	0	0	Phenylalanine ammonia-lyase
	Zm00001d018965	0	0	0	1	0	0	0	Xylanase inhibitor protein 1
	Zm00001d018966	0	0	0	1	0	0	0	Acidic endochitinase
	Zm00001d024587	0	0	0	1	1	0	0	Protein NRT1/ PTR FAMILY 6.3
	Zm00001d025043	0	0	0	1	0	0	0	ABC transporter C family member 4
	Zm00001d030888	0	0	0	1	0	0	0	Probable disease resistance protein
	Zm00001d036951	0	0	0	1	0	0	0	glutathione transferase19
	Zm00001d037656	0	0	0	1	0	0	0	Xylanase inhibitor protein 1
	Zm00001d042868	0	0	0	1	0	0	0	Aldo-keto reductase family 4 member C9
	Zm00001d043795	0	0	0	1	0	0	0	Glutathione S-transferase GSTU6
	Zm00001d043988	0	0	0	1	0	0	0	chitinase chem5
	Zm00001d044857	0	0	0	1	0	0	0	Putative AP2/EREBP transcription factor superfamily protein
	Zm00001d046961	0	0	0	1	0	0	0	VQ motif family protein
	Zm00001d048903	0	0	0	1	0	0	0	Acidic endochitinase
	Zm00001d049173	0	0	0	1	0	0	0	Putative WRKY DNA-binding domain superfamily protein
	Zm00001d051166	0	0	0	1	0	0	0	phenylalanine ammonia lyase4
	Zm00001d053781	0	0	0	1	0	0	0	-
V. response to jasmonic acid	Zm00001d009603	0	0	0	0	1	0	0	Solute carrier family 2%2C facilitated glucose transporter member 8
	Zm00001d012641	0	0	0	0	1	0	0	cytokinin oxidase4b
	Zm00001d014250	0	0	0	0	1	0	0	Protein TIFY 10B
	Zm00001d021562	0	0	0	0	1	0	0	Type III polyketide synthase B
	Zm00001d039052	0	0	0	0	1	0	0	Sugar transporter ERD6-like 6
	Zm00001d042111	0	0	0	0	1	0	0	tassels replace upper ears1
VI. response to reactive oxygen species	Zm00001d010945	0	0	0	0	0	1	0	Cysteine-rich receptor-like protein kinase 2
	Zm00001d014341	0	0	0	0	0	1	0	Peroxidase 53
	Zm00001d018627	0	0	0	0	0	1	0	monosaccharide transporter1
	Zm00001d021647	0	0	0	0	0	1	0	ABC transporter G family member 34
	Zm00001d028348	0	0	0	0	0	1	0	Peroxidase 53
	Zm00001d028368	0	0	0	0	0	1	0	Purple acid phosphatase 1
	Zm00001d028693	0	0	0	0	0	1	0	safener induced1
	Zm00001d029604	0	0	0	0	0	1	0	Peroxidase 2
	Zm00001d029922	0	0	0	0	0	1	0	Flavin-containing monooxygenase FMO GS-OX5
	Zm00001d036835	0	0	0	0	0	1	0	Peroxidase 67
	Zm00001d037359	0	0	0	0	0	1	0	Peroxidase 11
	Zm00001d040705	0	0	0	0	0	1	0	Peroxidase 64
	Zm00001d042022	0	0	0	0	0	1	0	Peroxidase 12
	Zm00001d042461	0	0	0	0	0	1	0	Leucine zipper protein-like
	Zm00001d052335	0	0	0	0	0	1	0	Peroxidase 67
	Zm00001d054044	0	0	0	0	0	1	0	Catalase isozyme 3
VII. other genes response to oxygen-containing compound	Zm00001d003009	0	0	0	0	0	0	0	senescence regulator
	Zm00001d003287	0	0	0	0	0	0	0	nitrate transport4
	Zm00001d005782	0	0	0	0	0	0	0	Glutamate receptor 2.7
	Zm00001d006256	0	0	0	0	0	0	0	syringolide-induced protein 14-1-1
	Zm00001d006535	0	0	0	0	0	0	0	Cysteine-rich receptor-like protein kinase 10
	Zm00001d009971	0	0	0	0	0	0	0	Protein SHI RELATED SEQUENCE 6
	Zm00001d011843	0	0	0	0	0	0	0	Protein SHI RELATED SEQUENCE 6
	Zm00001d013099	0	0	0	0	0	0	0	Probable carboxylesterase 15
	Zm00001d017287	0	0	0	0	0	0	0	-
	Zm00001d017976	0	0	0	0	0	0	0	Immediate-early fungal elicitor protein CMPG1
	Zm00001d020552	0	0	0	0	0	0	0	Tetraspanin-7
	Zm00001d024843	0	0	0	0	0	0	0	1-aminocyclopropane-1-carboxylate oxidase15
	Zm00001d028139	0	0	0	0	0	0	0	Protein indeterminate-domain 2
	Zm00001d033528	0	0	0	0	0	0	0	Protein NRT1/ PTR FAMILY 2.9
	Zm00001d034514	0	0	0	0	0	0	0	Germin-like protein subfamily T member 1
	Zm00001d036370	0	0	0	0	0	0	0	Chitinase2
	Zm00001d038081	0	0	0	0	0	0	0	Protein SHI RELATED SEQUENCE 6
	Zm00001d043569	0	0	0	0	0	0	0	Probable WRKY transcription factor 69
	Zm00001d043586	0	0	0	0	0	0	0	-
	Zm00001d051362	0	0	0	0	0	0	0	tonoplast intrinsic protein2
