# Supplementary material for: The Loss-Function of the Male Sterile Gene ZmMs33/ZmGPAT6 Results in Severely Oxidative Stress and Metabolic Disorder in Maize Anthers
Source: Cells. 2022 Jul 27;11(15):2318. doi: 10.3390/cells11152318 (PMC9367433; doi:10.3390/cells11152318)
Supplement: Supplementary file 1 [file cells-11-02318-s001.zip › Table S4.xlsx]

## Sheet: Table S4
Table S4: A list of 64 genes involved in ROS production, ROS scavenging and oxidative stress responses.
No.	Gene ID	Gene Names	Function/pathway	References
1	Zm00001d038762	Rboh3	NADPH oxidase	[1]
2	Zm00001d052653	Rboh4	NADPH oxidase	[1]
3	Zm00001d023238	LACS	Fatty acid β-oxidation	[2]
4	Zm00001d045295	LACS	Fatty acid β-oxidation	[2]
5	Zm00001d037521	FAO	Fatty acid β-oxidation	[2]
6	Zm00001d039768	FAO	Fatty acid β-oxidation	[2]
7	Zm00001d042884	FAO	Fatty acid β-oxidation	[2]
8	Zm00001d048890	FAO	Fatty acid β-oxidation	[2]
9	Zm00001d028303	BCAT2	BCAA catabolism	[3]
10	Zm00001d007892	BCKDH	BCAA catabolism	[3]
11	Zm00001d023694	BCKDH	BCAA catabolism	[3]
12	Zm00001d040670	BCKDH	BCAA catabolism	[3]
13	Zm00001d035475	IVDH	BCAA catabolism	[3]
14	Zm00001d031013	MCCA	BCAA catabolism	[3]
15	Zm00001d050336	MCCB	BCAA catabolism	[3]
16	Zm00001d019040	D2HGDH	BCAA catabolism	[3]
17	Zm00001d029853	ProDH	BCAA catabolism	[3]
18	Zm00001d045610	HGO	BCAA catabolism	[3]
19	Zm00001d032455	ETFQO	BCAA catabolism	[3]
20	Zm00001d034757	ETFα	BCAA catabolism	[3]
21	Zm00001d025025	ETFβ	BCAA catabolism	[3]
22	Zm00001d011889	ZmHXK3b	HXK	[4]
23	Zm00001d043511	ZmHXK6	HXK	[4]
24	Zm00001d014341	POD	Peroxidase (POD)	[5]
25	Zm00001d028348	POD	Peroxidase (POD)	[5]
26	Zm00001d029604	POD	Peroxidase (POD)	[5]
27	Zm00001d036835	POD	Peroxidase (POD)	[5]
28	Zm00001d037359	POD	Peroxidase (POD)	[5]
29	Zm00001d040705	POD	Peroxidase (POD)	[5]
30	Zm00001d042022	POD	Peroxidase (POD)	[5]
31	Zm00001d052335	POD	Peroxidase (POD)	[5]
32	Zm00001d037194	cupredoxines	Blue copper protein(cupredoxines)	[6]
33	Zm00001d052191	cupredoxines	Blue copper protein(cupredoxines)	[6]
34	Zm00001d003643	APX	The ascorbate glutathione cycle	[5, 7]
35	Zm00001d019237	APX	The ascorbate glutathione cycle	[5, 7]
36	Zm00001d051769	APX	The ascorbate glutathione cycle	[5, 7]
37	Zm00001d049954	MDAR	The ascorbate glutathione cycle	[5, 7]
38	Zm00001d008843	GLR	The ascorbate glutathione cycle	[5, 7]
39	Zm00001d017240	GLR	The ascorbate glutathione cycle	[5, 7]
40	Zm00001d037757	GLR	The ascorbate glutathione cycle	[5, 7]
41	Zm00001d039468	GLR	The ascorbate glutathione cycle	[5, 7]
42	Zm00001d018454	GR	The ascorbate glutathione cycle	[5, 7]
43	Zm00001d026154	GPX	The glutathione peroxidase cycle	[5, 7]
44	Zm00001d014848	CAT	Catalase	[5, 7]
45	Zm00001d054044	CAT	Catalase	[5, 7]
46	Zm00001d016736	PrxR	The peroxiredoxin cycle	[5, 7]
47	Zm00001d037103	PrxR	The peroxiredoxin cycle	[5, 7]
48	Zm00001d046682	PrxR	The peroxiredoxin cycle	[5, 7]
49	Zm00001d050666	PrxR	The peroxiredoxin cycle	[5, 7]
50	Zm00001d011352	Trx	The peroxiredoxin cycle	[5, 7]
51	Zm00001d023707	Trx	The peroxiredoxin cycle	[5, 7]
52	Zm00001d032337	Trx	The peroxiredoxin cycle	[5, 7]
53	Zm00001d034187	Trx	The peroxiredoxin cycle	[5, 7]
54	Zm00001d041804	Trx	The peroxiredoxin cycle	[5, 7]
55	Zm00001d044479	Trx	The peroxiredoxin cycle	[5, 7]
56	Zm00001d045366	Trx	The peroxiredoxin cycle	[5, 7]
57	Zm00001d002426	tAPX	The water-water cycle	[5, 7]
58	Zm00001d016802	tAPX	The water-water cycle	[5, 7]
59	Zm00001d031494	tAPX	The water-water cycle	[5, 7]
60	Zm00001d048611	Metallothionein	Metallothionein	[5, 7]
61	Zm00001d052147	MAPKKK	MAPK signaling pathway	[5, 7]
62	Zm00001d045064	MAPKK4/5	MAPK signaling pathway	[5, 7]
63	Zm00001d047758	MAPK3/6	MAPK signaling pathway	[5, 7]
64	Zm00001d017135	OXI1	MAPK signaling pathway	[5, 7]
References
1. Jiménez-Quesada, M.J. et al. NADPH Oxidase-Dependent Superoxide Production in Plant Reproductive Tissues. Front Plant Sci. 2016, 7, 359.
2. Theodoulou, F.L. et al. Seed storage oil catabolism: a story of give and take. Curr Opin Plant Biol. 2012, 15, 322-328.
3. Pedrotti, L. et al. Snf1-RELATED KINASE1-Controlled C/S1-bZIP Signaling Activates Alternative Mitochondrial Metabolic Pathways to Ensure Plant Survival in Extended Darkness. Plant Cell. 2018, 30, 495-509.
4. Poór, P. et al. Salicylic acid-induced ROS production by mitochondrial electron transport chain depends on the activity of mitochondrial hexokinases in tomato (Solanum lycopersicum L.). J Plant Res. 2019, 132, 273-283.
5. Mittler, R. et al. Reactive oxygen gene network of plants. Trends Plant Sci. 2004, 9, 490-498.
6. Zhang, K. et al.ZmSKS13, a cupredoxin domain-containing protein, is required for maize kernel development via modulation of redox homeostasis. New Phytol. 2021, 229, 2163-2178.
7. Mittler, R. Oxidative stress, antioxidants and stress tolerance. Trends Plant Sci. 2002, 7, 405-410.
