# Supplementary material for: The Loss-Function of the Male Sterile Gene ZmMs33/ZmGPAT6 Results in Severely Oxidative Stress and Metabolic Disorder in Maize Anthers
Source: Cells. 2022 Jul 27;11(15):2318. doi: 10.3390/cells11152318 (PMC9367433; doi:10.3390/cells11152318)
Supplement: Supplementary file 1 [file cells-11-02318-s001.zip › Table S5.xlsx]

## Sheet: Table S5
Table S5: A list of 32 genes involved in metabolic reprogramming.
No.	Gene ID	Gene ortholog	Gene Name	Function/pathway	References
1	Zm00001d003659	SnRK2	ZmSnRK2	SnRK2 pathway	[1]
2	Zm00001d016783	SnRK2			[1]
3	Zm00001d038326	SnRK2			[1]
4	Zm00001d050723	SnRK2			[1]
5	Zm00001d047531	AtS6K ortholog	ZmS6K	TOR pathway	[2, 3]
6	Zm00001d006017	AtS6K homolog			[2, 3]
7	Zm00001d029948	AtS6K homolog			[2, 3]
8	Zm00001d028793	AtPYL ortholog	ZmPYL	PP2CA pathway	[4-6]
9	Zm00001d038436	AtPYL ortholog			[4-6]
10	Zm00001d011131	AtABI1 ortholog	ZmABI1/ZmPP2CA		[4-6]
11	Zm00001d038846	AtABI1 ortholog			[4-6]
12	Zm00001d012962	AtABI1 homolog			[4-6]
13	Zm00001d013220	AtABI1 homolog			[4-6]
14	Zm00001d021582	AtABI1 homolog			[4-6]
15	Zm00001d034109	AtABI1 homolog			[4-6]
16	Zm00001d034655	AtABI1 homolog			[4-6]
17	Zm00001d035263	AtABI1 homolog			[4-6]
18	Zm00001d037949	AtABI1 homolog			[4-6]
19	Zm00001d045128	AtABI1 homolog			[4-6]
20	Zm00001d047385	AtABI1 homolog			[4-6]
21	Zm00001d047732	AtABI1 homolog			[4-6]
22	Zm00001d048131	AtABI1 homolog			[4-6]
23	Zm00001d002079	AtABI4 homolog	ZmABI4		[4-6]
24	Zm00001d017477	AtABI4 homolog			[4-6]
25	Zm00001d017591	AtABI4 homolog			[4-6]
26	Zm00001d026182	AtABI4 homolog			[4-6]
27	Zm00001d036298	AtABI4 homolog			[4-6]
28	Zm00001d037165	AtABI4 homolog			[4-6]
29	Zm00001d044857	AtABI4 homolog			[4-6]
30	Zm00001d046501	AtABI4 homolog			[4-6]
31	Zm00001d052152	AtABI4 homolog			[4-6]
32	Zm00001d052229	AtABI4 homolog			[4-6]
References
1. Mao, X.; Li, Y.; Rehman, S.U.; Miao, L.; Zhang, Y.; Chen, X.; Yu, C.; Wang, J.; Li, C.; Jing, R. The Sucrose Non-Fermenting 1-Related Protein Kinase 2 (SnRK2) Genes Are Multifaceted Players in Plant Growth, Development and Response to Environmental Stimuli. Plant Cell Physiol. 2020, 61, 225-242.
2. Smeekens, S.; Ma, J.; Hanson, J.; Rolland, F. Sugar signals and molecular networks controlling plant growth. Curr Opin Plant Biol 2010, 13, 274-279.
3. Garrocho-Villegas, V.; de Jimenez, E.S. TOR pathway activation in Zea mays L. tissues: conserved function between animal and plant kingdoms. Plant Signal Behav 2012, 7, 675-677.
4. Penfield, S.; Li, Y.; Gilday, A.D.; Graham, S.; Graham, I.A. Arabidopsis ABA INSENSITIVE4 regulates lipid mobilization in the embryo and reveals repression of seed germination by the endosperm. Plant Cell 2006, 18, 1887-1899.
5. Ramon, M.; Rolland, F.; Thevelein, J.M.; Van Dijck, P.; Leyman, B. ABI4 mediates the effects of exogenous trehalose on Arabidopsis growth and starch breakdown. Plant Mol. Biol. 2007, 63, 195-206.
6. Rodrigues, A.; Adamo, M.; Crozet, P.; Margalha, L.; Confraria, A.; Martinho, C.; Elias, A.; Rabissi, A.; Lumbreras, V.; Gonzalez-Guzman, M., et al. ABI1 and PP2CA phosphatases are negative regulators of Snf1-related protein kinase1 signaling in Arabidopsis. Plant Cell 2013, 25, 3871-3884.
