# Supplementary material for: The Loss-Function of the Male Sterile Gene ZmMs33/ZmGPAT6 Results in Severely Oxidative Stress and Metabolic Disorder in Maize Anthers
Source: Cells. 2022 Jul 27;11(15):2318. doi: 10.3390/cells11152318 (PMC9367433; doi:10.3390/cells11152318)
Supplement: Supplementary file 1 [file cells-11-02318-s001.zip › Table S6.xlsx]

## Sheet: Table S6
Table S6: A list of 39 reported maize GMS genes.
No.	Gene IDs	Gene symbol	Type	References
1	Zm00001d007714	ZmMs33	lipid	[1]
2	Zm00001d042777	ZmTGA9-2	TF	[2]
3	Zm00001d020938	ZmTGA10	TF	[2]
4	Zm00001d053890	ZmMs53	TF	[3]
5	Zm00001d052543	ZmTGA9-1	TF	[2]
6	Zm00001d043131	ZmMYB33-2	TF	[2]
7	Zm00001d006564	ZmMs32	TF	[4]
8	Zm00001d017724	ZmbHLH122	TF	[2]
9	Zm00001d053895	ZmbHLH51	TF	[2, 5-6]
10	Zm00001d042618	ZmSTS1	TF	[7]
11	Zm00001d025664	ZmMYB84	TF	[2]
12	Zm00001d042560	ZmIG1	TF	[8]
13	Zm00001d027837	ZmMs26	lipid	[9]
14	Zm00001d052403	ZmMs30	lipid	[10]
15	Zm00001d052736	Zmms44	lipid	[11]
16	Zm00001d020970	ZmDFR2	lipid	[12]
17	Zm00001d039276	ZmACOS5-2	lipid	[12]
18	Zm00001d046537	ZmABCG26	lipid	[13]
19	Zm00001d048337	ZmFAR1	lipid	[14]
20	Zm00001d047858	ZmMs45	lipid	[15]
21	Zm00001d012234	ZmMs8	sugar	[16]
22	Zm00001d036425	ZmSI1	TF	[17]
23	Zm00001d030069	ZmOCL4	TF	[18]
24	Zm00001d020680	ZmMs7	TF	[19]
25	Zm00001d008174	ZmMs23	TF	[20]
26	Zm00001d012294	ZmTGA9-3	TF	[2]
27	Zm00001d012544	ZmMYB33-1	TF	[2]
28	Zm00001d013416	ZmPHD11	TF	[2]
29	Zm00001d013732	ZmLBD27	TF	[2]
30	Zm00001d028777	ZmMs9	TF	[21]
31	Zm00001d033335	ZmLBD10	TF	[2]
32	Zm00001d015960	ZmIPE2	lipid	[22]
33	Zm00001d024712	ZmAPV1	lipid	[23]
34	Zm00001d029683	ZmIPE1	lipid	[24]
35	Zm00001d031488	ZmDFR1	lipid	[12]
36	Zm00001d043909	ZmMs39	sugar	[25-26]
37	Zm00001d020691	ZmMs54	others	[27]
38	Zm00001d018802	ZmMSCA1	others	[28]
39	Zm00001d023681	ZmMAC1	others	[29]
References
1. Xie, K.; Wu, S.W.; Li, Z.W.; Zhou, Y.; Zhang, D.F.; Dong, Z.Y.; An, X.L.; Zhu, T.T.; Zhang, S.M.; Liu, S.S., et al. Map-based cloning and characterization of Zea mays male sterility33 (ZmMs33) gene, encoding a glycerol-3-phosphate acyltransferase. Theoretical and Applied Genetics 2018, 131, 1363-1378.
2. Jiang, Y.L.; An, X.L.; Li, Z.W.; Yan, T.W.; Zhu, T.T.; Xie, K.; Liu, S.S.; Hou, Q.C.; Zhao, L.N.; Wu, S.W., et al. CRISPR/Cas9-based discovery of maize transcription factors regulating male sterility and their functional conservation in plants. Plant Biotechnol Journal 2021, 19, 1769-1784.
3. Liu, C.X.; Wang, G.Q.; Gao, J.; Li, C.Y.; Zhang, Z.R.; Yu, T.T.; Wang, J.G.; Zhou, l.; Cai, Y.L. Characterization, fine mapping and candidate gene analysis of novel, dominant, nuclear male-sterile gene Ms53 in maize. Euphytica 2018, 214, 52.
4. Moon, J.; Skibbe, D.; Timofejeva, L.; Wang, C.-J.R.; Kelliher, T.; Kremling, K.; Walbot, V.; Cande, W.Z. Regulation of cell divisions and differentiation by MALE STERILITY32 is required for anther development in maize. The Plant Journal 2013, 76, 592-602.
5. Liu, X.W.; Yue, Y.J.; Gu, Z.C.; Huang, Q.; Pan, Z.J.; Zhao, Z.F.; Zheng, M.M.; Zhang, Z.M.; Li, C.; Yi, H.Y., et al. The characterization and candidate gene isolation for a novel male-sterile mutant ms40 in maize. Plant Cell Reports 2021, 40, 1957-1970.
6. Shi, Z.; Ren, W.; Zhao, Y.X.; Wang, X.Q.; Zhang, R.Y.; Su, A.G.; Wang, S.; Li, C.H.; Wang, J.R.; Wang, S.S., et al. Identification of a locus associated with genic male sterility in maize via EMS mutagenesis and bulked-segregant RNA-seq. The Crop Journal 2020, 9, 1263-1269.
7. Abraham-Juárez, M.J.; Schrager-Lavelle, A.; Man, J.; Whipple, C.; Handakumbura, P.; Babbitt, C.; Bartletta, M. Evolutionary variation in MADS box dimerization affects floral development and protein abundance in maize. Plant Cell 2020, 32, 3408-3424.
8. Evans, M.M.S. The indeterminate gametophyte1 gene of maize encodes a LOB domain protein required for embryo sac and leaf development. Plant Cell 2007, 19, 46-62.
9. Djukanovic, V.; Smith, J.; Lowe, K.; Yang, M.Z.; Gao, H.R.; Jones, S.; Nicholson, M.G.; West, A.; Lape, J.; Bidney, D., et al. Male-sterile maize plants produced by targeted mutagenesis of the cytochrome P450-like gene (MS26) using a re-designed I-CreI homing endonuclease. The Plant Journal 2013, 76, 888-899.
10. An, X.L.; Dong, Z.Y.; Tian, Y.H.; Xie, K.; Wu, S.W.; Zhu, T.T.; Zhang, D.F.; Zhou, Y.; Niu, C.F.; Ma, B., et al. ZmMs30 encoding a novel GDSL lipase is essential for male fertility and valuable for hybrid breeding in maize. Molecular Plant 2019, 12, 343-359.
11. Fox, T.; Debruin, J.; Haug Collet, K.; Trimnell, M.; Clapp, J.; Leonard, A.; Li, B.; Scolaro, E.; Collinson, S.; Glassman, K., et al. A single point mutation in Ms44 results in dominant male sterility and improves nitrogen use efficiency in maize. Plant Biotechnology Journal 2017, 15, 942-952.
12. Liu, X.; Zhang, S.; Jiang, Y.; Yan, T.; Fang, C.; Hou, Q.; Wu, S.; Xie, K.; An, X.; Wan, X. Use of CRISPR/Cas9-Based Gene Editing to Simultaneously Mutate Multiple Homologous Genes Required for Pollen Development and Male Fertility in Maize. Cells 2022, 11, 439.
13. Jiang, Y.L.; Li, Z.W.; Liu, X.Z.; Zhu, T.T.; Xie, K.; Hou, Q.C.; Yan, T.W.; Niu, C.F.; Zhang, S.W.; Yang, M.B., et al. ZmFAR1 and ZmABCG26 regulated by microRNA are essential for lipid metabolism in maize anther. International Journal of Molecular Sciences 2021, 22, 7916.
14. Tian, Y.H.; Xiao, S.L.; Liu, J.; Somaratne, Y.; Zhang, H.; Wang, M.M.; Zhang, H.R.; Zhao, L.; Chen, H.B. MALE STERILE6021 (MS6021) is required for the development of anther cuticle and pollen exine in maize. Scientific Reports 2017, 7, 16736.
15. Cigan, A.M.; Unger, E.; Xu, R.J.; Kendall, T.; Fox, T.W. Phenotypic complementation of ms45 maize requires tapetal expression of MS45. Sexual Plant Reproduction 2001, 14, 135-142.
16. Wang, D.X.; Skibbe, D.S.; Walbot, V. Maize Male sterile 8 (Ms8), a putative β-1,3-galactosyltransferase, modulates cell division, expansion, and differentiation during early maize anther development. Plant Reproduction 2013, 26, 329-338.
17. Ambrose, B.A.; Lerner, D.R.; Ciceri, P.; Padilla, C.M.; Yanofsky, M.F.; Schmidt, R.J. Molecular and genetic analyses of the silky1 gene reveal conservation in floral organ specification between eudicots and monocots. Molecular Cell 2000, 5, 569-579.
18. Vernoud, V.; Laigle, G.; Rozier, F.; Meeley, R.B.; Perez, P.; Rogowsky, P.M. The HD-ZIP IV transcription factor OCL4 is necessary for trichome patterning and anther development in maize. The Plant Journal 2009, 59, 883-894.
19. Zhang, D.F.; Wu, S.W.; An, X.L.; Xie, K.; Dong, Z.Y.; Zhou, Y.; Xu, L.W.; Fang, W.; Liu, S.S.; Liu, S.S., et al. Construction of a multicontrol sterility system for a maize male-sterile line and hybrid seed production based on the ZmMs7 gene encoding a PHD-finger transcription factor. Plant Biotechnology Journal 2018, 16, 459-471.
20. Nan, G.L.; Zhai, J.X.; Arikit, S.; Morrow, D.; Fernandes, J.; Mai, L.; Nguyen, N.; Meyers, B.C.; Walbot, V. MS23, a master basic helix-loop-helix factor, regulates the specification and development of the tapetum in maize. Development 2017, 144, 163-172.
21. Albertsen, M.C.; Fox, T.; Leonard, A.; Li, B.L.; Loveland, B.; Trimnell, M. Cloning and use of the ms9 gene from maize. US20160024520A1, 2016.
22. Huo, Y.Q.; Pei, Y.R.; Tian, Y.H.; Zhang, Z.G.; Li, K.; Liu, J.; Xiao, S.L.; Chen, H.B. IRREGULAR POLLEN EXINE2 encodes a GDSL lipase essential for male fertility in maize. Plant Physiology 2020, 184, 1438-1454.
23. Somaratne, Y.; Tian, Y.H.; Zhang, H.; Wang, M.M.; Huo, Y.Q.; Cao, F.G.; Zhao, L.; Chen, H.B. ABNORMAL POLLEN VACUOLATION1 (APV1) is required for male fertility by contributing to anther cuticle and pollen exine formation in maize. The Plant Journal 2017, 90, 96-110.
24. Chen, X.Y.; Zhang, H.; Sun, H.; Luo, H.B.; Zhao, L.; Dong, Z.B.; Yan, S.S.; Zhao, C.; Liu, R.Y.; Xu, C.Y., et al. IRREGULAR POLLEN EXINE1 is a novel factor in anther cuticle and pollen exine formation. Plant Physiology 2017, 173, 307-325.
25. Zhu, Y.H. Fine mapping of male-sterile gene ms39 and genetic transformation the development related genes in maize Sichuan Agriculture University, Wenjiang, 2018.
26. Zhu, Y.H.; Shi, Z.W.; Li, S.Z.; Liu, H.Y.; Liu, F.X.; Niu, Q.K.; Li, C.; Wang, J.; Rong, T.Z.; Yi, H.Y., et al. Fine mapping of the novel male-sterile mutant gene ms39 in maize originated from outer space flight. Molecular Breeding 2018, 38, 125.
27. Liang, S.W. Map-Based Cloning of Genetic Male Sterile Gene ms54 in Maize Zhongkai University of Agriculture and Engineering, Guangzhou, 2020.
28. Chaubal, R.; Anderson, J.R.; Trimnell, M.R.; Fox, T.W.; Albertsen, M.C.; Bedinger, P. The transformation of anthers in the msca1 mutant of maize. Planta 2003, 216, 778-788.
29. Wang, C.-J.R.; Nan, G.-L.; Kelliher, T.; Timofejeva, L.; Vernoud, V.; Golubovskaya, I.N.; Harper, L.; Egger, R.; Walbot, V.; Cande, W.Z. Maize multiple archesporial cells 1 (mac1), an ortholog of rice TDL1A, modulates cell proliferation and identity in early anther development. Development 2012, 139, 2594-2603.
